# Supplementary material for: CO oxidation catalyzed by the single Co atom embedded hexagonal boron nitride nanosheet: a DFT-D study
Source: Royal Society of Chemistry journal article supplement (doi:10.1039/c6cp02221a), 2016-01-01
Supplement: c6cp02221a1.pdf [file c6cp02221a1.pdf]

## Supporting Information

### CO oxidation catalyzed by the single Co atom embedded hexagonal boron nitride nanosheet: a DFT-D study

Zhansheng Lu<sup>a, b</sup>, Peng Lv<sup>a</sup>, Yanli Liang<sup>a</sup>, Dongwei Ma<sup>\*c</sup>, Yi Zhang<sup>a</sup>, Wenjin Zhang<sup>a</sup>,  
Xinwei Yang<sup>a</sup>, Zongxian Yang<sup>\*a, d</sup>

<sup>a</sup> College of Physics and Materials Science, Henan Normal University, Xinxiang 453007,  
China

<sup>b</sup> Department of Physics and Astronomy, University of California, Irvine, CA 92697-4575,  
United States

<sup>c</sup> School of Physics, Anyang Normal University, Anyang 455000, China

<sup>d</sup> Collaborative Innovation Center of Nano Functional Materials and Applications, Henan  
Province, China

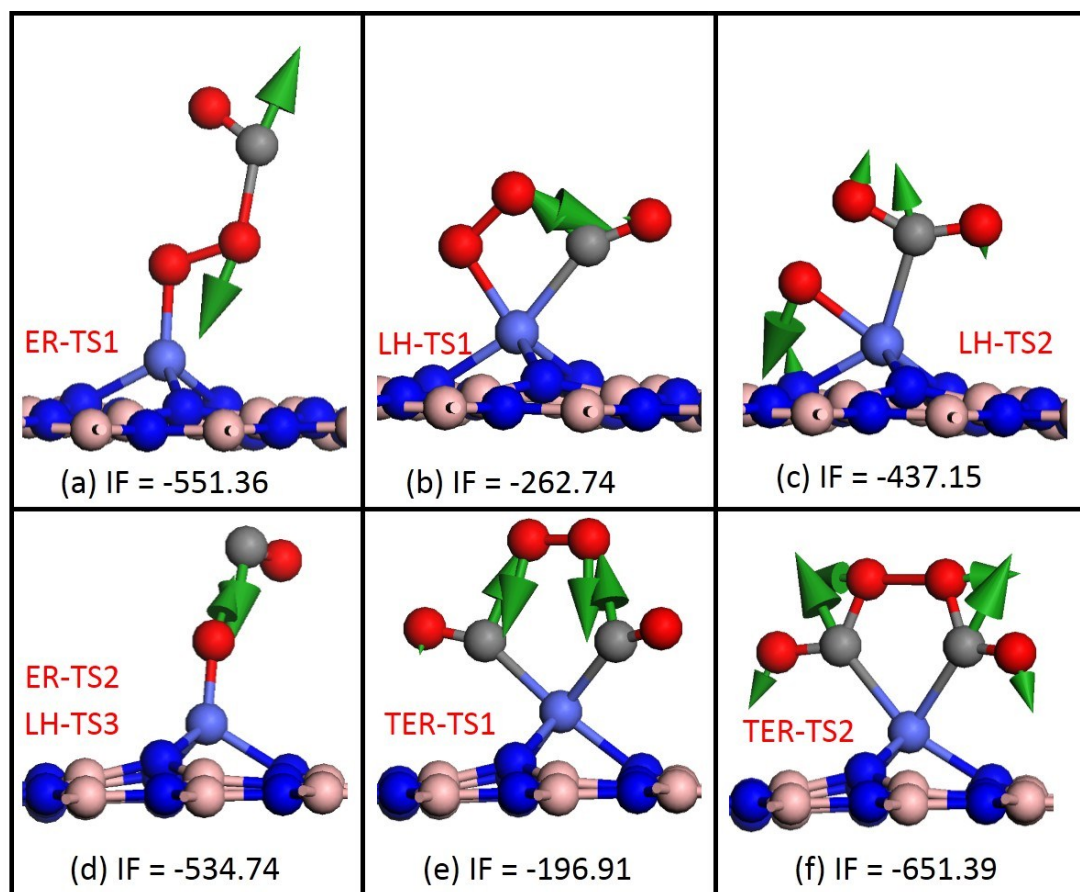

**Fig. S1.** The imaginary frequency (IF) values and vibration directions of transition states structures in ER, LH and TER mechanism.

\* Corresponding authors.

E-mail address: [dwmachina@126.com](mailto:dwmachina@126.com) (D. Ma) [yzx@henannu.edu.cn](mailto:yzx@henannu.edu.cn) (Z. Yang)
